# Supplementary material for: In silico study on identification of novel MALT1 allosteric inhibitors
Source: PubMed Central journal article supplement — RSC Adv. 2019 Nov 29;9(67):39338–47. doi: 10.1039/c9ra07036b (PMC9076111; doi:10.1039/c9ra07036b), 2019-11-29
Supplement: RA-009-C9RA07036B-s001.pdf [file RA-009-C9RA07036B-s001.pdf]

## **Supplementary informations of in silico study on identification of novel MALT1 allosteric inhibitors**

**Jinrui Zhang<sup>1</sup>, Li Ren<sup>3</sup>, Ye Wang<sup>2\*</sup>, Xuexun Fang<sup>1\*</sup>**

1 Key Laboratory for Molecular Enzymology and Engineering, the Ministry of Education, Jilin University, 2699 Qianjin Street, Changchun 130012, P. R. China.

2 School of Life Sciences, Jilin University, 2699 Qianjin Street, Changchun 130012, P. R. China.

3 College of Food Science and Engineering, Jilin University, 5333 Xi'an Street, Changchun, Jilin, 130062, P. R. China.

\*Co-corresponding author Ye Wang and Xuexun Fang

Fax: +86-431-85155249;

Tel: +86-431-85155249;

E-mail: [wangye0106@jlu.edu.cn](mailto:wangye0106@jlu.edu.cn) and [fangxx@jlu.edu.cn](mailto:fangxx@jlu.edu.cn)

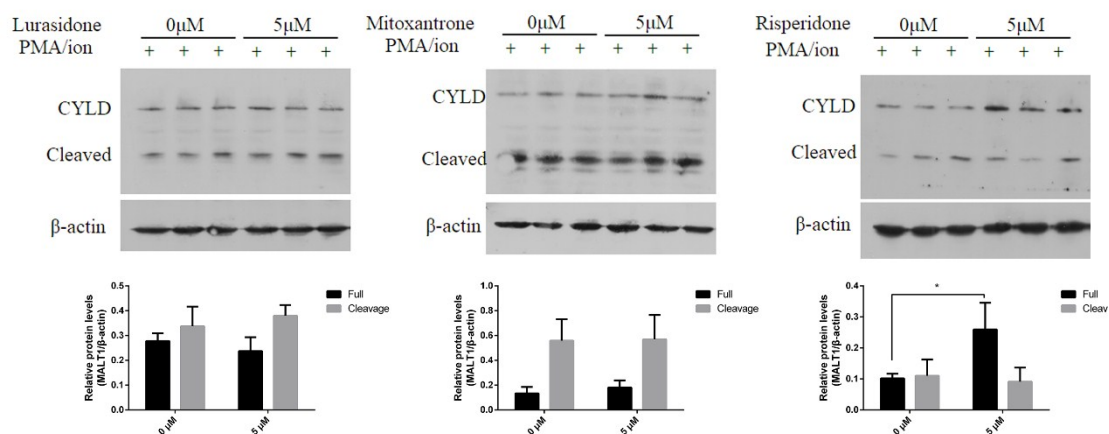

**Figure S1** Compounds have no effect on the cleavage of MALT1 substrate CYLD. Jurkat cells were treated with lurasidone, mitoxantrone and risperidone for 12 h and then stimulated with PMA/ionomycin for 120 min. Histogram showed the quantification of immunoblot that normalized with β-actin. Per test group has three independent experiments. Data was shown as mean ± SD, \*P < 0.05.

**Table S1** Properties of the top 10 compounds that bind to the allosteric site after virtual screening

| ZINC ID          | Chemical Name | Chemical structure                                                                   | poses | Energy* (kcal/mol) |
|------------------|---------------|--------------------------------------------------------------------------------------|-------|--------------------|
| ZINC000242437513 | Gentamicin    | 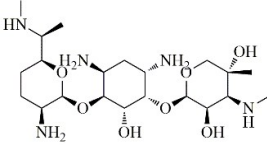 | 5     | -18.55             |
| ZINC000169621220 | Natamycin     |  | 1     | -16.05             |
| ZINC000003794794 | Mitoxantrone  |   | 6     | -14.35             |

|                  |              |                                                                                      |   |        |
|------------------|--------------|--------------------------------------------------------------------------------------|---|--------|
| ZINC000008214692 | Tobramycin   | 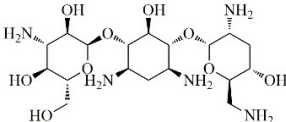   | 9 | -14.21 |
| ZINC000003927822 | Lurasidone   |     | 6 | -13.56 |
| ZINC000003873936 | Zazole       |    | 4 | -13.47 |
| ZINC000001481956 | Paliperidone |    | 3 | -13.16 |
| ZINC000001550477 | Lapatinib    |   | 8 | -13.12 |
| ZINC000000538312 | Risperdal    |  | 2 | -13.07 |
| ZINC000100003902 | Maraviroc    |  | 6 | -13.03 |

\*Estimated free energy of binding of virtual screening results by AutoDock program.

**Table S2** Properties of the top 10 compounds that bind to the catalytically active site after virtual screening

| ZNIC ID          | Chemical Name | Chemical structure                                                                   | poses | Energy* (kcal/mol) |
|------------------|---------------|--------------------------------------------------------------------------------------|-------|--------------------|
| ZINC000242437513 | Gentamicin    | 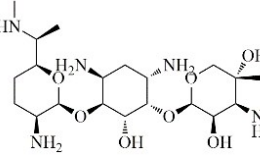  | 7     | -13.6              |
| ZINC000001612996 | Irinotecan    |  | 5     | -13.5              |

|                  |             |                                                                                     |    |        |
|------------------|-------------|-------------------------------------------------------------------------------------|----|--------|
| ZINC000019632618 | Imatinib    | 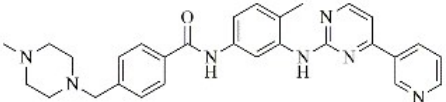  | 4  | -12.39 |
| ZINC000001999441 | Nebivololol |   | 6  | -12.24 |
| ZINC000084668739 | Lifitegrast |   | 2  | -11.7  |
| ZINC000026664090 | Saquinavir  |   | 10 | -11.63 |
| ZINC000072316335 | Ribociclib  |   | 4  | -11.63 |
| ZINC000169621220 | Natamycin   |   | 4  | -11.56 |
| ZINC000014210876 | Eluxadoline |  | 10 | -11.51 |
| ZINC000000608382 | Flavoxate   |  | 5  | -11.49 |

\*Estimated free energy of binding of virtual screening results by AutoDock program.
